# Supplementary material
Source: Research Square preprint supplement (doi:10.21203/rs.3.rs-9559239/v1)
Supplement: Supplementary file 1 [file 5d22b180e047f07322626559.docx]

***Supplementary***

***Saraca asoca* Alleviates PTU-induced Hypothyroidism in Rats: LC-MS Profiling and Identification of Betulinic acid as a Key Component for Its Thyroid Stimulatory Activity*:* *In Vivo* and *In Silico* Analyses**

Anand Kar1, Sagarika Biswas2,Meenakshi Singh3***,*** Debolina Chakraborty2, Sunanda Panda1***

**Table S1.**

Effects of three doses of *S. asoca* bark extract on serum levels of T3 (triiodothyronine), T4 (thyroxine), and TSH (thyrotropin) in rats.

**______________________________________________________________________________**

**Groups T3 (ng/ml) T4 (ng/ml) TSH (µIU/ml)**

_______________________________________________________________________________

Control 0.79 ± 0.04 50.32 ± 3.21 2.14 ± 0.02

SA (50 mg/kg) 0.81 ± 0.06 58.26 ± 3.98 2.10 ± 0.23

SA (100 mg/kg) 0.99 ± 0.03*** 91.12 ± 2.27*** 0.12 ± 0.03***

SA (200 mg/kg) 0.86 ± 0.07 53.12 ± 3.08 2.19 ± 0.09

______________________________________________________________________________

Values are expressed as mean ± SEM (n =7). *** *P*<0.001 as compared to the respective control value.

**Table S2.**

|  | **Control** | **PTU** | **SA** | **PTU+SA** | **T4+PTU** |
| --- | --- | --- | --- | --- | --- |
| Initial body weight (gm) | 196.14±5.68 | 198±4.88 | | | 195±9.77 | | --- | | | --- | --- | | | | 197.44±8.22 | | --- | | | --- | --- | | 196±9.12 |
| Final body weight(gm) | 201.55±6.01 | 163.55±5.98*** | 192.88±7.39 | 189.10±6.12### | 186±6.99### |

Values are expressed as mean ± SEM (n =7). *** *P*<0.001 as compared to the respective control value.

whereas ###*P*< 0.001 as compared to the respective value of PTU-induced animals. PTU-induced rats were compared with normal rats and PTU+ SA and PTU+T4 treated rats were compared with PTU alone treated group.
